# Supplementary material for: Bio-inspired graphene-derived membranes with strain-controlled interlayer spacing
Source: Royal Society of Chemistry journal article supplement (doi:10.1039/c8nr00013a), 2018-01-01
Supplement: c8nr00013a1.pdf [file c8nr00013a1.pdf]

Electronic Supplementary Material (ESI) for Nanoscale.

This journal is © The Royal Society of Chemistry 2018

## **Supplementary Information for**

### **Bio-Inspired Graphene-Derived Membranes with Strain-Controlled Interlayer Spacing**

Enlai Gao<sup>a,\*</sup> and Zhiping Xu<sup>a,b,\*</sup>

<sup>a</sup>Applied Mechanics Laboratory, Department of Engineering Mechanics and Center for Nano and Micro Mechanics, Tsinghua University, Beijing 100084, China.

<sup>b</sup>Applied Mechanics and Structure Safety Key Laboratory of Sichuan Province, School of Mechanics and Engineering, Southwest Jiaotong University, Chengdu 611756, China

\*Corresponding authors, email: [enlaigao@gmail.com](mailto:enlaigao@gmail.com), [xuzp@tsinghua.edu.cn](mailto:xuzp@tsinghua.edu.cn)

The Supporting Materials contain

- Supplementary Figures S1-S4.

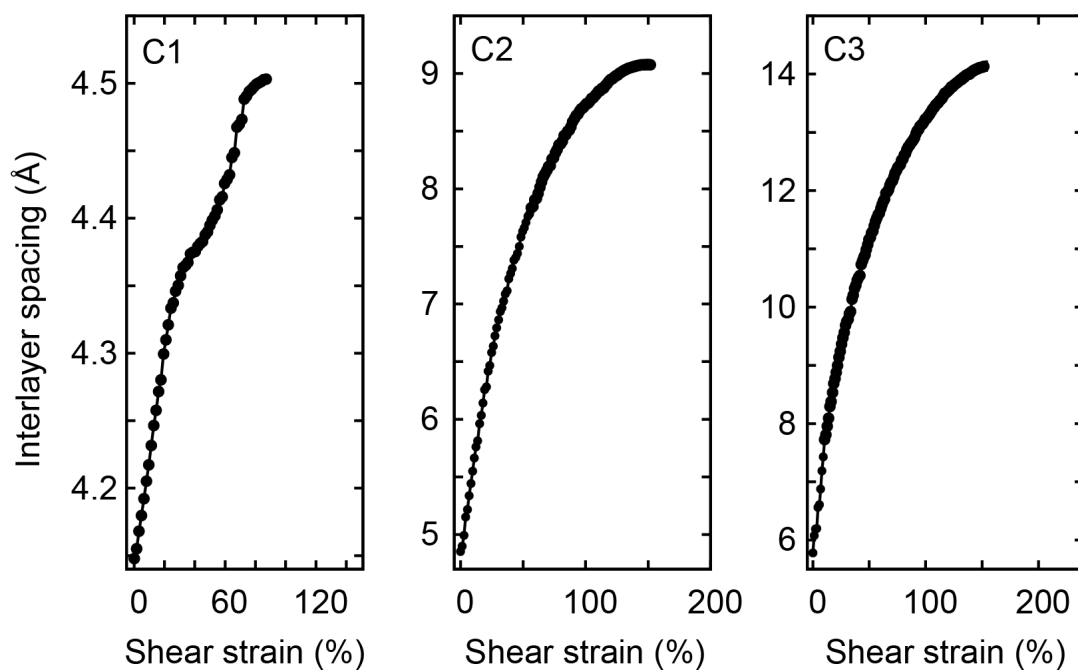

**Figure S1** The relation between interlayer spacing and shear strain calculated from DFT calculations, for supercells with three types of interlayer cross-links (C1, C2 and C3).

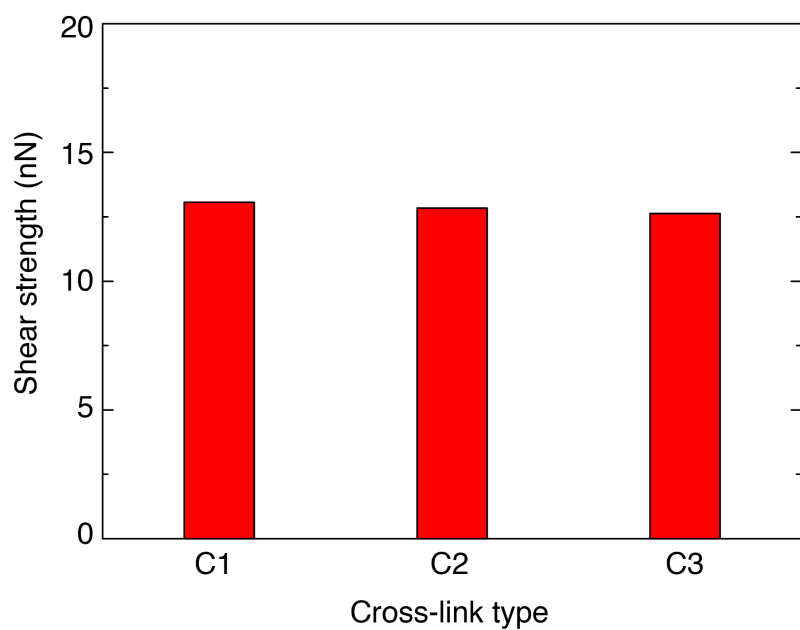

**Figure S2** The interfacial shear strength for graphene sheets cross-linked by C1, C2 and C3 structures, respectively.

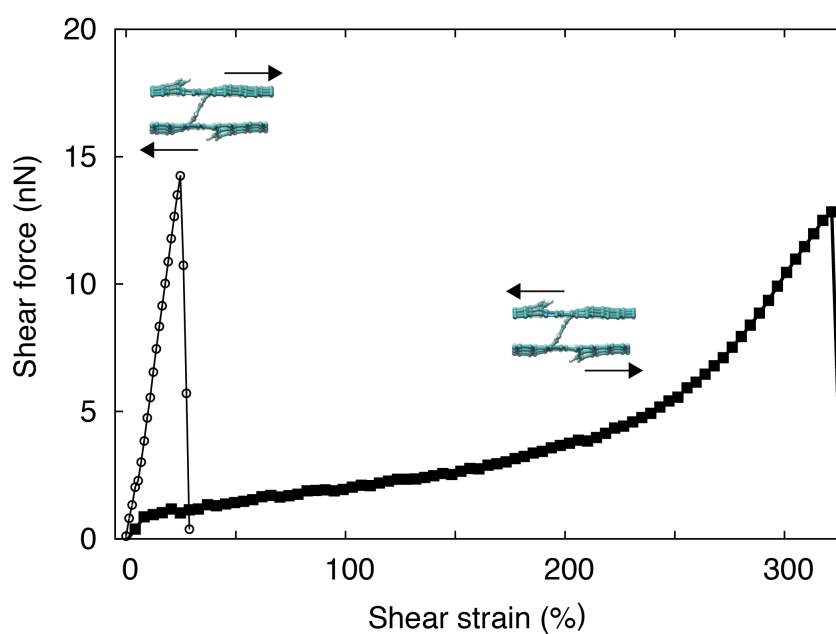

**Figure S3** The shear force-strain relation calculated from DFT calculations for graphene sheets cross-linked by the C2 cross-links that rotate clockwise and anticlockwisely, respectively.

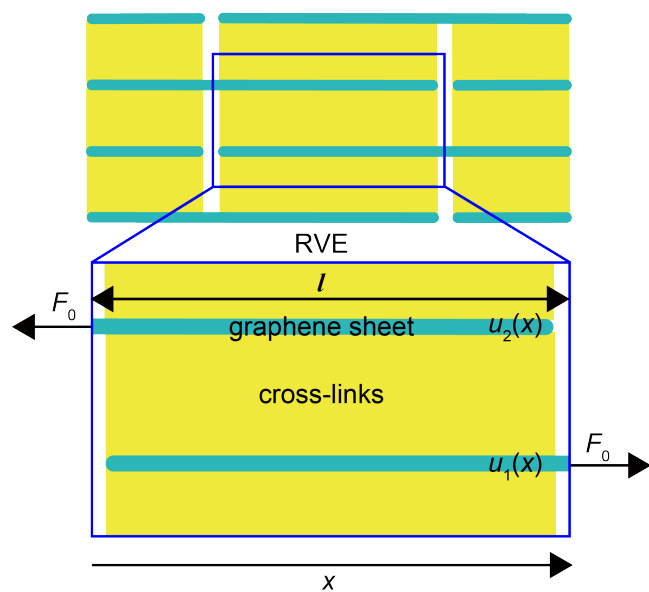

**Figure S4** A schematic illustration of the RVE used in the DTS model, where graphene sheets are crosslinked.
